# Supplementary material for: Optimal Feature Selection based Dental Caries Prediction Model Using Machine Learning for Decision Support System
Source: Preprints.org preprint supplement (doi:10.20944/preprints202301.0304.v1), 2023-01-17
Supplement: Supplementary file 1 [file supplementary]

## Supplementary Materials S1

**Table S1.** Description of attributes of the survey dataset used in our experiment.

| Variable Name | Variable Description                                               |
|---------------|--------------------------------------------------------------------|
| act_caries    | Presence of dental caries (label)                                  |
| Sido_No       | Area of residence of the subject of dental examination             |
| Region_No     | Region of residence of the subject of dental examination           |
| Gender        | Gender                                                             |
| Prev_caries   | Previously experienced dental caries                               |
| X1            | Awareness of dental and gum oral health                            |
| X2            | Dental treatment experience in the past year                       |
| X3            | Experience of needing dental treatment but not receiving treatment |
| X4_1          | Teeth brushed before breakfast                                     |
| X4_2          | Teeth brushed after breakfast                                      |
| X4_3          | Teeth brushed before lunch                                         |
| X4_4          | Teeth brushed after lunch                                          |
| X4_5          | Teeth brushed before dinner                                        |
| X4_6          | Teeth brushed after dinner                                         |
| X4_7          | Teeth brushed after snack                                          |
| X4_8          | Teeth brushed before going to bed                                  |
| X4_9          | Teeth not being brushed                                            |
| X5_1          | Regular dental floss usage Frequency                               |
| X5_2          | Handle floss usage Frequency                                       |
| X5_3          | Mouth wash usage Frequency                                         |
| X5_4          | Electric toothbrush usage Frequency                                |
| X5_5          | Oral care product usage?                                           |
| X6            | Use of toothpaste                                                  |
| X7            | Use of fluoride toothpaste                                         |
| X8            | Sticky snacks eaten today?                                         |
| X9            | Sticky snacks eaten yesterday?                                     |
| X10           | Pain in the gums or bleeding when brushing                         |
| X11           | Pain or discomfort in your teeth / past 1 year                     |
| X12           | Parents smoking                                                    |
| X13           | Smoking experience                                                 |
| X14_1         | Living with grandfather                                            |
| X14_2         | Living with grandmother                                            |
| X14_3         | Living with father                                                 |
| X14_4         | Living with stepfather                                             |
| X14_5         | Living with mother                                                 |
| X14_6         | Living with stepmother                                             |
| X14_7         | Living with older brother / older sister                           |
| X14_8         | Living with younger brother / younger sister                       |
| X14_9         | Not living with any of the above family member (orphans included)  |
| X15_1         | Household economic status                                          |
| X16           | Weekly allowance                                                   |
| Calculus      | Have tartar buildup                                                |
| Bleeding      | Gingival bleeding                                                  |
| Fluorosis     | Tooth speckle                                                      |

## Supplementary Materials S2

**Table S2.** The performance of difference models used.

| Model<br>s | Setting<br>Features | Full Features |          |           |        |          | Feature Selection |              |          |           |        | Feature Importance |                      |              |            |                    |         |          |                       |        |        |                      |        |        |        |        |
|------------|---------------------|---------------|----------|-----------|--------|----------|-------------------|--------------|----------|-----------|--------|--------------------|----------------------|--------------|------------|--------------------|---------|----------|-----------------------|--------|--------|----------------------|--------|--------|--------|--------|
|            |                     | #of Features  | F1-score | Precision | Recall | Accuracy | Method            | #of Features | F1-score | Precision | Recall | Accuracy           | Method               | #of Features | F1-score   | Precision          | Recall  | Accuracy |                       |        |        |                      |        |        |        |        |
| GBDT       | 43                  | 43            | 0.8635   | 0.9490    | 0.7921 | 0.8966   | Chi-Square        | 43           | 0.9358   | 0.9994    | 0.8799 | 0.9503             | Chi-Square<br>+ GINI | 16           | 0.9374     | 0.9984             | 0.8835  | 0.9515   |                       |        |        |                      |        |        |        |        |
| RF         |                     |               | 0.8868   | 0.9186    | 0.8572 | 0.9105   |                   |              | 0.9342   | 0.9994    | 0.8771 | 0.9491             |                      | 20           | 0.9370     | 0.9982             | 0.8830  | 0.9512   |                       |        |        |                      |        |        |        |        |
| LR         |                     |               | 0.7773   | 0.7959    | 0.7598 | 0.8203   |                   |              | 0.7754   | 0.7996    | 0.7530 | 0.8202             |                      | 40           | 0.7814     | 0.8012             | 0.7625  | 0.8256   |                       |        |        |                      |        |        |        |        |
| SVM        |                     |               | 0.7862   | 0.7434    | 0.8345 | 0.8128   |                   |              | 0.8804   | 0.9021    | 0.8599 | 0.9037             |                      | N/A          |            |                    |         |          |                       |        |        |                      |        |        |        |        |
| LSTM       |                     |               | 0.7575   | 0.7428    | 0.7436 | 0.7467   |                   |              | 0.8300   | 0.8300    | 0.8300 | 0.8400             |                      | N/A          |            |                    |         |          |                       |        |        |                      |        |        |        |        |
| GBDT       |                     |               | N/A      |           |        |          |                   |              | Relief F | 43        | 0.9358 | 0.9990             |                      | 0.8802       | 0.9503     | Relief F<br>+ GINI | 17      | 0.9360   | 0.9937                | 0.8847 | 0.9504 |                      |        |        |        |        |
| RF         | 0.9342              | 0.9994        |          |           |        |          |                   | 0.8771       |          |           | 0.9491 | 0.9342             | 0.9994               | 0.8771       | 0.9491     |                    | 20      | 0.9372   | 0.9978                | 0.8835 | 0.9513 |                      |        |        |        |        |
| LR         | 0.7767              | 0.7960        |          |           |        |          |                   | 0.7586       |          |           | 0.8202 | 0.7767             | 0.7960               | 0.7586       | 0.8202     |                    | 41      | 0.7805   | 0.7622                | 0.7622 | 0.8239 |                      |        |        |        |        |
| SVM        | 0.8806              | 0.9028        |          |           |        |          |                   | 0.8596       |          |           | 0.9039 | 0.8806             | 0.9028               | 0.8596       | 0.9039     |                    | N/A     |          |                       |        |        |                      |        |        |        |        |
| LSTM       | 0.8300              | 0.8400        |          |           |        |          |                   | 0.8300       |          |           | 0.8400 | 0.8300             | 0.8400               | 0.8300       | 0.8400     |                    | N/A     |          |                       |        |        |                      |        |        |        |        |
| GBDT       | mRMR                | 0.9356        |          |           |        |          |                   | 0.9987       |          |           | 0.8792 | 0.9501             | 0.9356               | 0.9987       | 0.8792     |                    | 0.9501  | 20       | 0.9378                | 0.9990 | 0.8837 | 0.9518               |        |        |        |        |
| RF         |                     | 0.8844        |          |           |        |          |                   | 0.9185       | 0.8530   | 0.9081    | 0.8844 | 0.9185             | 0.8530               | 0.9081       | 21         | 0.8785             | 0.88979 | 0.8598   | 0.9023                |        |        |                      |        |        |        |        |
| LR         |                     | 0.7762        |          |           |        |          |                   | 0.7986       | 0.7552   | 0.8205    | 0.7762 | 0.7986             | 0.7552               | 0.8205       | 41         | 0.7814             | 0.8012  | 0.7625   | 0.8247                |        |        |                      |        |        |        |        |
| SVM        |                     | 0.8800        |          |           |        |          |                   | 0.8979       | 0.8629   | 0.9030    | 0.8800 | 0.8979             | 0.8629               | 0.9030       | N/A        |                    |         |          |                       |        |        |                      |        |        |        |        |
| LSTM       |                     | 0.8300        |          |           |        |          |                   | 0.8400       | 0.8200   | 0.8400    | 0.8300 | 0.8400             | 0.8200               | 0.8400       | N/A        |                    |         |          |                       |        |        |                      |        |        |        |        |
| GBDT       |                     | Correlation   |          |           |        |          |                   | 42           | 0.9355   | 0.9994    | 0.8793 | 0.9500             | Correlation          | 42           | 0.9355     | 0.9994             | 0.8793  | 0.9500   | Correlation<br>+ GINI | 17     | 0.9375 | 0.9964               | 0.8852 | 0.9515 |        |        |
| RF         | 0.8893              |               |          |           |        |          |                   |              | 0.9232   | 0.8580    | 0.9120 | 0.8893             |                      |              | 0.9232     | 0.8580             | 0.9120  | 21       |                       | 0.8814 | 0.9009 | 0.8628               | 0.9046 |        |        |        |
| LR         | 0.7749              |               |          |           |        |          |                   |              | 0.7985   | 0.7529    | 0.8198 | 0.7749             |                      |              | 0.7985     | 0.7529             | 0.8198  | 42       |                       | 0.7813 | 0.8012 | 0.7623               | 0.8246 |        |        |        |
| SVM        | 0.8831              |               |          |           |        |          |                   |              | 0.9032   | 0.8640    | 0.9057 | 0.8831             |                      |              | 0.9032     | 0.8640             | 0.9057  | N/A      |                       |        |        |                      |        |        |        |        |
| LSTM       | 0.8300              |               |          |           |        |          |                   |              | 0.8400   | 0.8200    | 0.8400 | 0.8300             |                      |              | 0.8400     | 0.8200             | 0.8400  | N/A      |                       |        |        |                      |        |        |        |        |
| GBDT       | 40                  |               |          |           |        |          |                   |              | N/A      | N/A       | N/A    | N/A                |                      |              | Chi-Square | 40                 | 0.9358  | 0.9998   |                       | 0.8796 | 0.9503 | Chi-Square<br>+ GINI | 16     | 0.9367 | 0.9990 | 0.8818 |
| RF         |                     | 0.9342        |          |           |        |          |                   | 0.9997       |          |           |        |                    | 0.8769               | 0.9491       |            |                    | 0.9342  | 0.9997   | 0.8769                | 0.9491 | 18     |                      | 0.9359 | 0.9956 | 0.8830 | 0.9503 |
| LR         |                     | 0.7675        |          |           |        |          |                   | 0.7888       |          |           |        |                    | 0.7477               | 0.8135       |            |                    | 0.7675  | 0.7888   | 0.7477                | 0.8135 | 39     |                      | 0.7703 | 0.7882 | 0.7531 | 0.8154 |
| SVM        |                     | 0.8549        | 0.8667   | 0.8434    | 0.8819 | 0.8549   | 0.8667            | 0.8434       |          |           |        |                    | 0.8819               | N/A          |            |                    |         |          |                       |        |        |                      |        |        |        |        |
| LSTM       |                     | 0.8300        | 0.8300   | 0.8200    | 0.8400 | 0.8300   | 0.8300            | 0.8200       |          |           |        |                    | 0.8400               | N/A          |            |                    |         |          |                       |        |        |                      |        |        |        |        |
| GBDT       |                     | 40            | N/A      | N/A       | N/A    | N/A      | Relief F          | 40           |          |           |        |                    | 0.9355               | 0.9989       |            |                    | 0.8797  | 0.9500   | Relief F<br>+ GINI    | 15     | 0.9356 |                      | 0.9914 | 0.8857 | 0.9499 |        |
| RF         | 0.9342              |               |          |           |        |          |                   |              | 0.9989   | 0.8775    | 0.9491 | 0.9342             | 0.9989               | 0.8775       | 0.9491     | 18                 | 0.9353  | 0.9933   |                       | 0.8837 | 0.9498 |                      |        |        |        |        |
| LR         | 0.7740              |               |          |           |        |          |                   |              | 0.7959   | 0.7535    | 0.8186 | 0.7740             | 0.7959               | 0.7535       | 0.8186     | 38                 | 0.7788  | 0.7985   |                       | 0.7601 | 0.8226 |                      |        |        |        |        |
| SVM        | 0.8157              |               |          |           |        |          |                   |              | 0.8127   | 0.8187    | 0.8480 | 0.8157             | 0.8127               | 0.8187       | 0.8480     | N/A                |         |          |                       |        |        |                      |        |        |        |        |
| LSTM       | 0.8300              |               |          |           |        |          |                   |              | 0.8300   | 0.8200    | 0.8400 | 0.8300             | 0.8300               | 0.8200       | 0.8400     | N/A                |         |          |                       |        |        |                      |        |        |        |        |

| Model s | Setting Features | Full Features |          |           |            |             | Feature Selection |              |          |           |             |                   | Feature Importance |              |                 |                    |        |          |        |         |        |
|---------|------------------|---------------|----------|-----------|------------|-------------|-------------------|--------------|----------|-----------|-------------|-------------------|--------------------|--------------|-----------------|--------------------|--------|----------|--------|---------|--------|
|         |                  | #of Features  | F1-score | Precision | Recall     | Accuracy    | Method            | #of Features | F1-score | Precision | Recall      | Accuracy          | Method             | #of Features | F1-score        | Precision          | Recall | Accuracy |        |         |        |
| GBDT    |                  |               |          |           |            | mRMR        |                   | 0.9355       | 0.9989   | 0.8798    | 0.9500      | mRMR + GINI       | 15                 | 0.9370       | 0.9968          | 0.8840             | 0.9512 |          |        |         |        |
| RF      |                  |               |          |           |            |             |                   | 0.8706       | 0.8935   | 0.8489    | 0.8959      |                   | 24                 | 0.8619       | 0.8465          | 0.8779             | 0.8886 |          |        |         |        |
| LR      |                  |               |          |           |            |             |                   | 0.7571       | 0.7758   | 0.7395    | 0.8044      |                   | 38                 | 0.7648       | 0.7814          | 0.7490             | 0.8108 |          |        |         |        |
| SVM     |                  |               |          |           |            |             |                   | 0.8474       | 0.8540   | 0.8410    | 0.8751      |                   | N/A                |              |                 |                    |        |          |        |         |        |
| LSTM    |                  |               |          |           |            |             |                   | 0.8100       | 0.8100   | 0.8000    | 0.8100      |                   | N/A                |              |                 |                    |        |          |        |         |        |
| GBDT    |                  |               |          |           |            | Correlation | 42                |              |          |           |             | 0.9355            | 0.9994             | 0.8793       | 0.9500          | Correlation + GINI | 17     | 0.9357   | 0.9937 | 0.8842  | 0.9501 |
| RF      |                  |               |          |           |            |             |                   |              |          |           |             | 0.8893            | 0.9232             | 0.8580       | 0.9120          |                    | 21     | 0.8795   | 0.8996 | 0.86024 | 0.9031 |
| LR      |                  |               |          |           |            |             |                   |              |          |           |             | 0.7709            | 0.7942             | 0.7491       | 0.8164          |                    | 41     | 0.7814   | 0.8012 | 0.7625  | 0.8247 |
| SVM     |                  |               |          |           |            |             |                   |              |          |           |             | 0.7881            | 0.8145             | 0.7634       | 0.8307          |                    | N/A    |          |        |         |        |
| LSTM    |                  |               |          |           |            |             |                   |              |          |           |             | 0.8300            | 0.8300             | 0.8300       | 0.8400          |                    | N/A    |          |        |         |        |
| GBDT    | 35               | N/A           |          |           | Chi-Square |             |                   | 0.9351       | 0.9988   | 0.8791    | 0.9497      | Chi-Square + GINI | 16                 | 0.9351       | 0.9958          | 0.8814             | 0.9498 |          |        |         |        |
| RF      |                  |               |          |           |            |             |                   | 0.9331       | 0.9984   | 0.8759    | 0.9482      |                   | 18                 | 0.9355       | 0.9954          | 0.8824             | 0.9500 |          |        |         |        |
| LR      |                  |               |          |           |            |             |                   | 0.7197       | 0.7597   | 0.6838    | 0.7804      |                   | 33                 | 0.7302       | 0.7596          | 0.7031             | 0.7866 |          |        |         |        |
| SVM     |                  |               |          |           |            |             |                   | 0.8190       | 0.8126   | 0.8256    | 0.8496      |                   | N/A                |              |                 |                    |        |          |        |         |        |
| LSTM    |                  |               |          |           |            |             |                   | 0.8300       | 0.8300   | 0.8300    | 0.8400      |                   | N/A                |              |                 |                    |        |          |        |         |        |
| GBDT    |                  |               |          |           | Relief F   | 35          |                   |              |          |           | 0.9333      | 0.9994            | 0.8756             | 0.9484       | Relief F + GINI | 13                 | 0.9321 | 0.9966   | 0.8755 | 0.9476  |        |
| RF      |                  |               |          |           |            |             |                   |              |          |           | 0.9264      | 0.9821            | 0.8767             | 0.9425       |                 | 17                 | 0.9284 | 0.9799   | 0.8821 | 0.9441  |        |
| LR      |                  |               |          |           |            |             |                   |              |          |           | 0.7381      | 0.7700            | 0.7089             | 0.7926       |                 | 33                 | 0.7296 | 0.7687   | 0.6944 | 0.7886  |        |
| SVM     |                  |               |          |           |            |             |                   |              |          |           | 0.7389      | 0.7875            | 0.6960             | 0.7971       |                 | N/A                |        |          |        |         |        |
| LSTM    |                  |               |          |           |            |             |                   |              |          |           | 0.8000      | 0.8000            | 0.7900             | 0.8100       |                 | N/A                |        |          |        |         |        |
| GBDT    | mRMR             |               |          |           |            |             | 0.9363            | 0.9996       | 0.8807   | 0.9506    | mRMR + GINI | 15                | 0.9370             | 0.9962       | 0.8844          | 0.9511             |        |          |        |         |        |
| RF      |                  |               |          |           |            |             | 0.8502            | 0.8614       | 0.8394   | 0.8781    |             | 21                | 0.8480             | 0.8576       | 0.8386          | 0.8765             |        |          |        |         |        |
| LR      |                  |               |          |           |            |             | 0.7184            | 0.7337       | 0.7039   | 0.7726    |             | 33                | 0.7249             | 0.7384       | 0.7119          | 0.7780             |        |          |        |         |        |
| SVM     |                  |               |          |           |            |             | 0.7740            | 0.7364       | 0.8157   | 0.8036    |             | N/A               |                    |              |                 |                    |        |          |        |         |        |
| LSTM    |                  |               |          |           |            |             | 0.7800            | 0.7800       | 0.7800   | 0.7900    |             | N/A               |                    |              |                 |                    |        |          |        |         |        |
| GBDT    | 35               | N/A           |          |           |            | Correlation | 42                | 0.9355       | 0.9994   | 0.8793    | 0.9500      | Correlation+ GINI | 14                 | 0.9334       | 0.9891          | 0.8837             | 0.9482 |          |        |         |        |
| RF      |                  |               |          |           |            |             | 42                | 0.8893       | 0.9232   | 0.8580    | 0.9120      |                   | 21                 | 0.8757       | 0.8968          | 0.8555             | 0.9002 |          |        |         |        |
| LR      |                  |               |          |           |            |             |                   | 0.7748       | 0.7983   | 0.7528    | 0.8196      |                   | 41                 | 0.7814       | 0.8012          | 0.7625             | 0.8247 |          |        |         |        |
| SVM     |                  |               |          |           |            |             |                   | 0.7525       | 0.8097   | 0.7572    | 0.8265      |                   | N/A                |              |                 |                    |        |          |        |         |        |
| LSTM    |                  |               |          |           |            |             |                   | 0.8300       | 0.8300   | 0.8300    | 0.8400      |                   | N/A                |              |                 |                    |        |          |        |         |        |
| GBDT    | 30               | N/A           |          |           |            | Chi-Square  | 30                | 0.9345       | 0.9992   | 0.8778    | 0.9493      | Chi-Square + GINI | 12                 | 0.9361       | 0.9958          | 0.8831             | 0.9505 |          |        |         |        |
| RF      |                  |               |          |           |            |             |                   | 0.9325       | 0.9945   | 0.8778    | 0.9476      |                   | 16                 | 0.9321       | 0.9888          | 0.8816             | 0.9473 |          |        |         |        |

| Model s | Setting Features | Full Features |          |           |        |             | Feature Selection |                   |          |           |                 |                    | Feature Importance |                   |                 |           |        |          |        |        |
|---------|------------------|---------------|----------|-----------|--------|-------------|-------------------|-------------------|----------|-----------|-----------------|--------------------|--------------------|-------------------|-----------------|-----------|--------|----------|--------|--------|
|         |                  | #of Features  | F1-score | Precision | Recall | Accuracy    | Method            | #of Features      | F1-score | Precision | Recall          | Accuracy           | Method             | #of Features      | F1-score        | Precision | Recall | Accuracy |        |        |
| LR      |                  |               |          |           |        |             |                   | 0.7058            | 0.7485   | 0.6680    | 0.7706          |                    |                    | 28                | 0.7104          | 0.7491    | 0.6754 | 0.7737   |        |        |
| SVM     |                  |               |          |           |        |             |                   | 0.7929            | 0.7769   | 0.8096    | 0.8256          |                    |                    | N/A               |                 |           |        |          |        |        |
| LSTM    |                  |               |          |           |        |             |                   | 0.7900            | 0.7900   | 0.7900    | 0.8000          |                    |                    | N/A               |                 |           |        |          |        |        |
| GBDT    |                  |               |          |           |        |             |                   | Relief F          | 0.9227   | 0.9997    | 0.8568          |                    |                    | 0.9408            | Relief F + GINI | 13        | 0.9168 | 1.0000   | 0.8465 | 0.9369 |
| RF      |                  |               |          |           |        |             |                   |                   | 0.9108   | 0.9953    | 0.8397          |                    |                    | 0.9322            |                 | 15        | 0.9062 | 0.9856   | 0.8386 | 0.9287 |
| LR      |                  |               |          |           |        |             |                   |                   | 0.6767   | 0.7657    | 0.6063          |                    |                    | 0.7611            |                 | 28        | 0.6897 | 0.7679   | 0.6259 | 0.7686 |
| SVM     |                  |               |          |           |        |             |                   |                   | 0.6851   | 0.7684    | 0.6181          |                    |                    | 0.7656            |                 | N/A       |        |          |        |        |
| LSTM    |                  |               |          |           |        |             |                   | 0.7600            | 0.7800   | 0.7500    | 0.7800          |                    |                    | N/A               |                 |           |        |          |        |        |
| GBDT    |                  |               |          |           |        |             |                   | mRMR              | 0.9359   | 0.9998    | 0.8798          |                    |                    | 0.9503            | mRMR + GINI     | 18        | 0.9379 | 0.9984   | 0.8844 | 0.9519 |
| RF      |                  |               |          |           |        |             |                   |                   | 0.8335   | 0.8409    | 0.8265          |                    |                    | 0.8639            |                 | 19        | 0.8299 | 0.88356  | 0.8244 | 0.8612 |
| LR      |                  |               |          |           |        | 0.7127      | 0.7275            |                   | 0.6986   | 0.7678    | 39              | 0.7081             | 0.7312             | 0.6864            |                 | 0.7675    |        |          |        |        |
| SVM     |                  |               |          |           |        | 0.7155      | 0.7186            |                   | 0.7125   | 0.7663    | N/A             |                    |                    |                   |                 |           |        |          |        |        |
| LSTM    |                  |               |          |           |        | 0.7800      | 0.7800            |                   | 0.7800   | 0.7900    | N/A             |                    |                    |                   |                 |           |        |          |        |        |
| GBDT    |                  |               |          |           |        | Correlation | 42                | 0.9355            | 0.9994   | 0.8793    | 0.9500          | Correlation + GINI | 14                 | 0.9311            | 0.9852          | 0.8826    | 0.9463 |          |        |        |
| RF      |                  |               |          |           |        |             |                   | 0.8893            | 0.9232   | 0.8580    | 0.9120          |                    | 21                 | 0.8757            | 0.8968          | 0.8555    | 0.9002 |          |        |        |
| LR      |                  |               |          |           |        |             |                   | 0.7748            | 0.7983   | 0.7528    | 0.8196          |                    | 41                 | 0.7814            | 0.8012          | 0.7625    | 0.8247 |          |        |        |
| SVM     |                  |               |          |           |        |             |                   | 0.7841            | 0.8108   | 0.7591    | 0.8276          |                    | N/A                |                   |                 |           |        |          |        |        |
| LSTM    |                  |               |          |           |        |             |                   | 0.8400            | 0.8200   | 0.8300    | 0.8400          |                    | N/A                |                   |                 |           |        |          |        |        |
| GBDT    |                  |               |          |           |        | 25          | N/A               | Chi-Square        | 25       | 0.9337    | 0.9981          | 0.8772             | 0.9486             | Chi-Square + GINI | 12              | 0.9328    | 0.9974 | 0.8760   | 0.9481 |        |
| RF      |                  |               |          |           |        |             |                   |                   |          | 0.9247    | 0.9779          | 0.8771             | 0.9412             |                   | 14              | 0.9249    | 0.9689 | 0.8847   | 0.9410 |        |
| LR      | 0.6844           | 0.7400        | 0.6369   | 0.7579    | 23     |             |                   |                   |          | 0.6847    | 0.7380          | 0.6386             | 0.7584             |                   |                 |           |        |          |        |        |
| SVM     | 0.7565           | 0.7916        | 0.7245   | 0.8077    | N/A    |             |                   |                   |          |           |                 |                    |                    |                   |                 |           |        |          |        |        |
| LSTM    | 0.8200           | 0.8300        | 0.8300   | 0.8300    | N/A    |             |                   |                   |          |           |                 |                    |                    |                   |                 |           |        |          |        |        |
| GBDT    | Relief F         | 0.8850        | 0.9991   | 0.7944    | 0.9419 |             |                   | Chi-Square + GINI | 12       | 0.8630    | 0.9995          | 0.7594             | 0.9010             |                   |                 |           |        |          |        |        |
| RF      |                  | 0.8428        | 0.9948   | 0.7312    | 0.8875 |             |                   |                   | 14       | 0.8489    | 0.9923          | 0.7416             | 0.8915             |                   |                 |           |        |          |        |        |
| LR      | 25               | N/A           | Relief F | 25        | 0.6236 |             |                   | 0.5983            | 0.6512   | 0.6759    | Relief F + GINI | 24                 | 0.6333             | 0.6056            | 0.6638          | 0.6843    |        |          |        |        |
| SVM     |                  |               |          |           | 0.6329 |             |                   | 0.5893            | 0.6841   | 0.6729    |                 | N/A                |                    |                   |                 |           |        |          |        |        |
| LSTM    |                  |               |          |           | 0.8000 |             |                   | 0.7900            | 0.7900   | 0.8000    |                 | N/A                |                    |                   |                 |           |        |          |        |        |
| GBDT    |                  |               | mRMR     | 0.9344    | 0.9972 | 0.8792      | 0.9492            | mRMR + GINI       | 13       | 0.9327    | 0.9877          | 0.8835             | 0.9476             |                   |                 |           |        |          |        |        |
| RF      |                  |               |          | 0.8161    | 0.8221 | 0.8104      | 0.8494            |                   | 18       | 0.8102    | 0.8126          | 0.8077             | 0.8445             |                   |                 |           |        |          |        |        |
| LR      |                  |               |          | 0.6943    | 0.7141 | 0.6757      | 0.7548            |                   | 24       | 0.7095    | 0.7238          | 0.6958             | 0.7659             |                   |                 |           |        |          |        |        |
| SVM     |                  |               |          | 0.7572    | 0.8872 | 0.6605      | 0.8253            |                   | N/A      |           |                 |                    |                    |                   |                 |           |        |          |        |        |

| Model s | Setting Features | Full Features |          |           |        |          | Feature Selection |              |          |           |        |          | Feature Importance |              |          |           |        |          |             |        |        |         |        |        |                    |    |        |        |        |        |    |        |        |        |        |
|---------|------------------|---------------|----------|-----------|--------|----------|-------------------|--------------|----------|-----------|--------|----------|--------------------|--------------|----------|-----------|--------|----------|-------------|--------|--------|---------|--------|--------|--------------------|----|--------|--------|--------|--------|----|--------|--------|--------|--------|
|         |                  | #of Features  | F1-score | Precision | Recall | Accuracy | Method            | #of Features | F1-score | Precision | Recall | Accuracy | Method             | #of Features | F1-score | Precision | Recall | Accuracy |             |        |        |         |        |        |                    |    |        |        |        |        |    |        |        |        |        |
| LSTM    |                  |               |          |           |        |          |                   |              |          |           |        |          |                    |              |          |           |        |          |             |        |        |         |        |        |                    |    |        |        |        |        |    |        |        |        |        |
| GBDT    |                  |               |          |           |        |          |                   |              |          |           |        |          |                    |              |          |           |        |          | Correlation | 42     | 0.8300 | 0.8300  | 0.8300 | 0.8300 | Correlation + GINI | 13 | 0.9271 | 0.9770 | 0.8821 | 0.9630 |    |        |        |        |        |
| RF      |                  |               |          |           |        |          |                   |              |          |           |        |          |                    |              |          |           |        |          |             |        | 0.9355 | 0.9994  | 0.8793 | 0.9500 |                    |    |        |        |        |        | 21 | 0.8757 | 0.8968 | 0.8555 | 0.9002 |
| LR      |                  |               |          |           |        |          |                   |              |          |           |        |          |                    |              |          |           |        |          |             |        | 0.8893 | 0.9232  | 0.8580 | 0.9120 |                    |    |        |        |        |        |    |        |        |        |        |
| SVM     |                  |               |          |           |        |          |                   |              |          |           |        |          |                    |              |          |           |        |          |             |        | 0.7748 | 0.7983  | 0.7528 | 0.8196 |                    |    |        |        |        |        |    |        |        |        |        |
| LSTM    |                  |               |          |           |        |          |                   |              |          |           |        |          |                    |              |          |           |        |          |             |        | 0.7659 | 0.7913  | 0.7422 | 0.8137 |                    |    |        |        |        |        |    |        |        |        |        |
|         |                  |               |          |           |        |          |                   |              |          |           |        |          |                    |              |          |           |        |          | 0.8300      | 0.8200 | 0.8300 | 0.8400  |        |        |                    |    |        |        |        |        |    |        |        |        |        |
| GBDT    | 20               | N/A           |          |           |        |          |                   |              |          |           |        |          |                    |              |          |           |        |          |             |        |        |         |        |        |                    |    |        |        |        |        |    |        |        |        |        |
| RF      |                  |               |          |           |        |          |                   |              |          |           |        |          |                    |              |          |           |        |          | Chi-Square  | 20     | 0.9282 | 0.9989  | 0.8670 | 0.9447 | Chi-Square + GINI  | 10 | 0.9265 | 0.9969 | 0.8654 | 0.9436 |    |        |        |        |        |
| LR      |                  |               |          |           |        |          |                   |              |          |           |        |          |                    |              |          |           |        |          |             |        | 0.9419 | 0.9757  | 0.8687 | 0.9369 |                    |    |        |        |        |        | 11 | 0.9134 | 0.9635 | 0.8682 | 0.9323 |
| SVM     |                  |               |          |           |        |          |                   |              |          |           |        |          |                    |              |          |           |        |          |             |        | 0.6738 | 0.7233  | 0.6309 | 0.7482 |                    |    |        |        |        |        |    |        |        |        |        |
| LSTM    |                  |               |          |           |        |          |                   |              |          |           |        |          |                    |              |          |           |        |          |             |        | 0.7027 | 0.7175  | 0.6888 | 0.7598 |                    |    |        |        |        |        |    |        |        |        |        |
| GBDT    |                  |               |          |           |        |          |                   |              |          |           |        |          |                    |              |          |           |        |          |             |        | 0.8200 | 0.8200  | 0.8200 | 0.8300 |                    |    |        |        |        |        |    |        |        |        |        |
| RF      |                  |               |          |           |        |          |                   |              |          |           |        |          |                    |              |          |           |        |          | Relief F    | 20     | 0.7511 | 0.9996  | 0.6017 | 0.8355 | Relief F + GINI    | 11 | 0.7283 | 1.0    | 0.5727 | 0.8244 |    |        |        |        |        |
| LR      |                  |               |          |           |        |          |                   |              |          |           |        |          |                    |              |          |           |        |          |             |        | 0.7090 | 0.9997  | 0.5494 | 0.8140 |                    |    |        |        |        |        | 10 | 0.6907 | 0.9983 | 0.5280 | 0.8057 |
| SVM     |                  |               |          |           |        |          |                   |              |          |           |        |          |                    |              |          |           |        |          |             |        | 0.3079 | 0.68332 | 0.1988 | 0.6315 |                    |    |        |        |        |        |    |        |        |        |        |
| LSTM    |                  |               |          |           |        |          |                   |              |          |           |        |          |                    |              |          |           |        |          |             |        | 0.6508 | 0.5448  | 0.8082 | 0.6424 |                    |    |        |        |        |        |    |        |        |        |        |
| GBDT    |                  |               |          |           |        |          |                   |              |          |           |        |          |                    |              |          |           |        |          |             |        | 0.7900 | 0.8000  | 0.7800 | 0.8000 |                    |    |        |        |        |        |    |        |        |        |        |
| RF      |                  |               |          |           |        |          |                   |              |          |           |        |          |                    |              |          |           |        |          | mRMR        | 20     | 0.9340 | 0.9994  | 0.8768 | 0.9490 | mRMR + GINI        | 11 | 0.9338 | 0.9986 | 0.8769 | 0.9489 |    |        |        |        |        |
| LR      |                  |               |          |           |        |          |                   |              |          |           |        |          |                    |              |          |           |        |          |             |        | 0.7486 | 0.7849  | 0.7889 | 0.8238 |                    |    |        |        |        |        | 18 | 0.794  | 0.7489 | 0.7990 | 0.8299 |
| SVM     |                  |               |          |           |        |          |                   |              |          |           |        |          |                    |              |          |           |        |          |             |        | 0.6785 | 0.6968  | 0.6611 | 0.7416 |                    |    |        |        |        |        |    |        |        |        |        |
| LSTM    |                  |               |          |           |        |          |                   |              |          |           |        |          |                    |              |          |           |        |          |             |        | 0.7305 | 0.6978  | 0.7666 | 0.7667 |                    |    |        |        |        |        |    |        |        |        |        |
| GBDT    |                  |               |          |           |        |          |                   |              |          |           |        |          |                    |              |          |           |        |          |             |        | 0.7800 | 0.7900  | 0.7800 | 0.7900 |                    |    |        |        |        |        |    |        |        |        |        |
| RF      |                  |               |          |           |        |          |                   |              |          |           |        |          |                    |              |          |           |        |          | Correlation | 42     | 0.9355 | 0.9994  | 0.8793 | 0.9500 | Correlation + GINI | 11 | 0.9238 | 0.9725 | 0.8798 | 0.9404 |    |        |        |        |        |
| LR      |                  |               |          |           |        |          |                   |              |          |           |        |          |                    |              |          |           |        |          |             |        | 0.8893 | 0.9232  | 0.8580 | 0.9120 |                    |    |        |        |        |        | 21 | 0.8787 | 0.8968 | 0.8555 | 0.9002 |
| SVM     |                  |               |          |           |        |          |                   |              |          |           |        |          |                    |              |          |           |        |          |             |        | 0.7748 | 0.7983  | 0.7528 | 0.8196 |                    |    |        |        |        |        |    |        |        |        |        |
| LSTM    |                  |               |          |           |        |          |                   |              |          |           |        |          |                    |              |          |           |        |          | N/A         |        |        |         |        |        |                    |    |        |        |        |        |    |        |        |        |        |
| GBDT    | 0.7878           | 0.8118        | 0.7651   | 0.8300    | N/A    |          |                   |              |          |           |        |          |                    |              |          |           |        |          |             |        |        |         |        |        |                    |    |        |        |        |        |    |        |        |        |        |
| RF      | 0.8300           | 0.8400        | 0.8300   | 0.8400    |        |          |                   |              |          |           |        |          |                    |              |          |           |        |          |             |        |        |         |        |        |                    |    |        |        |        |        |    |        |        |        |        |
| GBDT    | 15               | N/A           |          |           |        |          |                   |              |          |           |        |          |                    |              |          |           |        |          |             |        |        |         |        |        |                    |    |        |        |        |        |    |        |        |        |        |
| RF      |                  |               |          |           |        |          |                   |              |          |           |        |          |                    |              |          |           |        |          | Chi-Square  | 15     | 0.9152 | 0.9960  | 0.8466 | 0.8353 | Chi-Square+ GINI   | 8  | 0.9164 | 0.9961 | 0.8486 | 0.9364 |    |        |        |        |        |
| LR      |                  |               |          |           |        |          |                   |              |          |           |        |          |                    |              |          |           |        |          |             |        | 0.8997 | 0.9990  | 0.8185 | 0.9248 |                    |    |        |        |        |        | 9  | 0.9043 | 0.9939 | 0.8294 | 0.9278 |
| SVM     |                  |               |          |           |        |          |                   |              |          |           |        |          |                    |              |          |           |        |          |             |        | 0.6330 | 0.7038  | 0.5754 | 0.7249 |                    |    |        |        |        |        |    |        |        |        |        |
| LSTM    |                  |               |          |           |        |          |                   |              |          |           |        |          |                    |              |          |           |        |          |             |        | 0.6385 | 0.7076  | 0.5818 | 0.7284 |                    |    |        |        |        |        |    |        |        |        |        |
| GBDT    |                  |               |          |           |        |          |                   |              |          |           |        |          |                    |              |          |           |        |          |             |        | 0.8300 | 0.8400  | 0.8300 | 0.8400 |                    |    |        |        |        |        |    |        |        |        |        |
| RF      |                  |               |          |           |        |          |                   |              |          |           |        |          |                    |              |          |           |        |          | Relief F    | 15     | 0.5772 | 0.9997  | 0.4058 | 0.7549 | Relief F           | 9  | 0.5660 | 1.0    | 0.3947 | 0.7513 |    |        |        |        |        |

| Model s | Setting Features | Full Features |          |           |        |          | Feature Selection |              |          |                 |             |             | Feature Importance |              |          |           |        |          |  |  |                    |                    |        |        |        |         |        |
|---------|------------------|---------------|----------|-----------|--------|----------|-------------------|--------------|----------|-----------------|-------------|-------------|--------------------|--------------|----------|-----------|--------|----------|--|--|--------------------|--------------------|--------|--------|--------|---------|--------|
|         |                  | #of Features  | F1-score | Precision | Recall | Accuracy | Method            | #of Features | F1-score | Precision       | Recall      | Accuracy    | Method             | #of Features | F1-score | Precision | Recall | Accuracy |  |  |                    |                    |        |        |        |         |        |
| RF      |                  |               |          |           |        |          |                   |              |          |                 |             | + GINI      | 8                  | 0.5278       | 1.0      | 0.3585    | 0.7365 |          |  |  |                    |                    |        |        |        |         |        |
| LR      |                  |               |          |           |        |          |                   |              |          |                 |             |             | 14                 | 0.0224       | 0.5322   | 0.0114    | 0.5897 |          |  |  |                    |                    |        |        |        |         |        |
| SVM     |                  |               |          |           |        |          |                   |              |          |                 |             |             | N/A                |              |          |           |        |          |  |  |                    |                    |        |        |        |         |        |
| LSTM    |                  |               |          |           |        |          |                   |              |          |                 |             |             | N/A                |              |          |           |        |          |  |  |                    |                    |        |        |        |         |        |
| GBDT    |                  |               |          |           |        |          |                   |              |          |                 |             | mRMR        |                    |              |          |           |        |          |  |  |                    | mRMR + GINI        | 10     | 0.9294 | 0.9938 | 0.8729  | 0.9455 |
| RF      |                  |               |          |           |        |          |                   |              |          |                 |             |             |                    |              |          |           |        |          |  |  |                    |                    | 14     | 0.7020 | 0.7131 | 0.6912  | 0.7589 |
| LR      |                  |               |          |           |        |          |                   |              |          |                 |             |             |                    |              |          |           |        |          |  |  |                    |                    | 14     | 0.6413 | 0.6776 | 0.6087  | 0.7202 |
| SVM     |                  |               |          |           |        |          |                   |              |          |                 |             |             |                    |              |          |           |        |          |  |  |                    |                    | N/A    |        |        |         |        |
| LSTM    |                  |               |          |           |        |          |                   |              |          |                 |             | Correlation |                    |              |          |           |        |          |  |  |                    | Correlation + GINI | 9      | 0.9235 | 0.9852 | 0.8691  | 0.9408 |
| GBDT    |                  |               |          |           |        |          |                   |              |          |                 |             |             |                    |              |          |           |        |          |  |  |                    |                    | 21     | 0.8757 | 0.8968 | 0.8555  | 0.9002 |
| RF      |                  |               |          |           |        |          |                   |              |          |                 |             |             |                    |              |          |           |        |          |  |  |                    |                    | 41     | 0.7814 | 0.8012 | 0.7625  | 0.8247 |
| LR      |                  |               |          |           |        |          |                   |              |          |                 |             |             |                    |              |          |           |        |          |  |  |                    |                    | N/A    |        |        |         |        |
| SVM     |                  |               |          |           |        |          |                   |              |          |                 |             |             |                    |              |          |           |        |          |  |  |                    |                    | N/A    |        |        |         |        |
| LSTM    |                  |               |          |           |        |          |                   |              |          |                 |             | 10          | N/A                |              |          |           |        |          |  |  |                    | Chi-Square + GINI  | 6      | 0.8859 | 0.9995 | 0.7955  | 0.9158 |
| GBDT    |                  |               |          |           |        |          |                   |              |          |                 |             |             |                    |              |          |           |        |          |  |  |                    |                    | 7      | 0.8613 | 1.0000 | 0.74564 | 0.8999 |
| RF      | 9                | 0.5508        | 0.6615   | 0.4719    | 0.6838 |          |                   |              |          |                 |             |             |                    |              |          |           |        |          |  |  |                    |                    |        |        |        |         |        |
| LR      | N/A              |               |          |           |        |          |                   |              |          |                 |             |             |                    |              |          |           |        |          |  |  |                    |                    |        |        |        |         |        |
| SVM     | Relief F         |               |          |           |        |          |                   |              |          | Relief F + GINI | 8           |             |                    |              |          |           |        |          |  |  |                    |                    | 0.2959 | 1.0000 | 0.1736 | 0.6605  |        |
| LSTM    |                  |               |          |           |        |          |                   |              |          |                 | 8           |             |                    |              |          |           |        |          |  |  |                    |                    | 0.2989 | 1.0000 | 0.1745 | 0.6613  |        |
| GBDT    |                  |               |          |           |        |          |                   |              |          |                 | 9           |             |                    |              |          |           |        |          |  |  |                    |                    | 0.0277 | 0.5157 | 0.0142 | 0.5895  |        |
| RF      |                  |               |          |           |        |          |                   |              |          |                 | N/A         |             |                    |              |          |           |        |          |  |  |                    |                    |        |        |        |         |        |
| LR      |                  |               |          |           |        |          |                   |              |          |                 | N/A         |             |                    |              |          |           |        |          |  |  |                    |                    |        |        |        |         |        |
| SVM     | 10               | N/A           |          |           |        |          |                   |              |          |                 | mRMR + GINI |             |                    |              |          |           |        |          |  |  |                    |                    | 8      | 0.9204 | 1.0000 | 0.8525  | 0.9394 |
| LSTM    |                  |               |          |           |        |          |                   |              |          |                 |             | 9           | 0.6082             | 0.6357       | 0.5830   | 0.6914    |        |          |  |  |                    |                    |        |        |        |         |        |
| GBDT    |                  |               |          |           |        |          |                   |              |          |                 |             | 9           | 0.5791             | 0.6284       | 0.5369   | 0.6793    |        |          |  |  |                    |                    |        |        |        |         |        |
| RF      |                  |               |          |           |        |          |                   |              |          |                 |             | N/A         |                    |              |          |           |        |          |  |  |                    |                    |        |        |        |         |        |
| LR      |                  |               |          |           |        |          |                   |              |          |                 |             | Correlation |                    |              |          |           |        |          |  |  | Correlation + GINI | 9                  | 0.9235 | 0.9852 | 0.8691 | 0.9408  |        |
| SVM     |                  |               |          |           |        |          |                   |              |          |                 |             |             |                    |              |          |           |        |          |  |  |                    | 21                 | 0.8757 | 0.8968 | 0.8555 | 0.9002  |        |
| LSTM    |                  |               |          |           |        |          |                   |              |          |                 |             |             |                    |              |          |           |        |          |  |  |                    | 41                 | 0.7814 | 0.8012 | 0.7625 | 0.8247  |        |
| GBDT    |                  |               |          |           |        |          |                   |              |          |                 |             |             |                    |              |          |           |        |          |  |  |                    | N/A                |        |        |        |         |        |
| RF      |                  |               |          |           |        |          |                   |              |          |                 |             | N/A         |                    |              |          |           |        |          |  |  |                    |                    |        |        |        |         |        |
| LR      |                  |               |          |           |        |          |                   |              |          |                 |             | N/A         |                    |              |          |           |        |          |  |  |                    |                    |        |        |        |         |        |

| Model s | Setting Features | Full Features |          |           |        |          | Feature Selection |              |          |           |        | Feature Importance |        |              |                   |           |                    |                 |        |        |             |        |        |
|---------|------------------|---------------|----------|-----------|--------|----------|-------------------|--------------|----------|-----------|--------|--------------------|--------|--------------|-------------------|-----------|--------------------|-----------------|--------|--------|-------------|--------|--------|
|         |                  | #of Features  | F1-score | Precision | Recall | Accuracy | Method            | #of Features | F1-score | Precision | Recall | Accuracy           | Method | #of Features | F1-score          | Precision | Recall             | Accuracy        |        |        |             |        |        |
| SVM     | 5                | N/A           |          |           |        |          |                   | 0.7934       | 0.7483   | 0.8443    | 0.8194 |                    | N/A    |              |                   |           |                    |                 |        |        |             |        |        |
| LSTM    |                  |               |          |           |        |          |                   | 0.8300       | 0.8400   | 0.8300    | 0.8400 |                    | N/A    |              |                   |           |                    |                 |        |        |             |        |        |
| GBDT    |                  |               |          |           |        |          |                   | Chi-Square   | 5        | 0.7532    | 0.9981 |                    | 0.6049 | 0.8366       | Chi-Square + GINI | 3         | 0.7610             | 1.0000          | 0.6142 | 0.8415 |             |        |        |
| RF      |                  |               |          |           |        |          |                   |              |          | 0.7455    | 0.9980 |                    | 0.5952 | 0.8326       |                   | 3         | 0.7555             | 1.0000          | 0.6071 | 0.8386 |             |        |        |
| LR      |                  |               |          |           |        |          |                   |              |          | 0.4618    | 0.7227 |                    | 0.3394 | 0.6738       |                   | 4         | 0.4552             | 0.7185          | 0.3332 | 0.6724 |             |        |        |
| SVM     |                  |               |          |           |        |          |                   |              |          | N/A       |        |                    |        |              |                   |           |                    |                 |        |        |             |        |        |
| LSTM    |                  |               |          |           |        |          |                   |              |          | N/A       |        |                    |        |              |                   |           |                    |                 |        |        |             |        |        |
| GBDT    |                  |               |          |           |        |          |                   |              |          | Relief F  | 5      |                    | 0.0884 | 1.0000       |                   | 0.0462    | 0.6066             | Relief F + GINI | 3      | 0.0909 | 1.0000      | 0.0476 | 0.6087 |
| RF      |                  |               |          |           |        |          |                   |              |          |           |        |                    | 0.0828 | 1.0000       |                   | 0.0432    | 0.6054             |                 | 4      | 0.0828 | 1.0000      | 0.0432 | 0.6054 |
| LR      |                  |               |          |           |        |          |                   |              |          |           |        |                    | 0.0317 | 0.5530       |                   | 0.0163    | 0.5888             |                 | 4      | 0.0280 | 0.4797      | 0.0144 | 0.5886 |
| SVM     |                  |               |          |           |        |          |                   |              |          |           |        |                    | N/A    |              |                   |           |                    |                 |        |        |             |        |        |
| LSTM    |                  |               |          |           |        |          |                   |              |          |           |        |                    | N/A    |              |                   |           |                    |                 |        |        |             |        |        |
| GBDT    |                  |               |          |           |        |          |                   |              |          |           |        |                    | mRMR   | 5            |                   | 0.8346    | 1.0000             |                 | 0.7163 | 0.8830 | mRMR + GINI | 4      | 0.8411 |
| RF      |                  |               |          |           |        |          |                   |              |          | 0.6125    | 0.5524 |                    |        |              |                   | 0.6874    | 0.6413             | 4               | 0.6007 | 0.5402 |             | 0.6765 | 0.6306 |
| LR      |                  |               |          |           |        |          |                   | 0.5594       | 0.5506   | 0.5686    | 0.6305 |                    |        |              | 4                 | 0.5539    | 0.5416             | 0.5668          | 0.6249 |        |             |        |        |
| SVM     |                  |               |          |           |        |          |                   | N/A          |          |           |        |                    |        |              |                   |           |                    |                 |        |        |             |        |        |
| LSTM    |                  |               |          |           |        |          |                   | N/A          |          |           |        |                    |        |              |                   |           |                    |                 |        |        |             |        |        |
| GBDT    |                  |               |          |           |        |          |                   | Correlation  | 42       | 0.9355    | 0.9994 |                    |        |              | 0.8793            | 0.9500    | Correlation + GINI | 9               | 0.9235 | 0.9852 |             | 0.8691 | 0.9408 |
| RF      |                  |               |          |           |        |          |                   |              |          | 0.8893    | 0.9232 |                    | 0.8580 | 0.9120       | 21                | 0.8757    |                    | 0.8968          | 0.8555 | 0.9002 |             |        |        |
| LR      |                  |               |          |           |        |          |                   |              |          | 0.7748    | 0.7983 |                    | 0.7528 | 0.8196       | 41                | 0.7814    |                    | 0.8012          | 0.7625 | 0.8247 |             |        |        |
| SVM     | N/A              |               |          |           |        |          |                   |              |          |           |        |                    |        |              |                   |           |                    |                 |        |        |             |        |        |
| LSTM    | N/A              |               |          |           |        |          |                   |              |          |           |        |                    |        |              |                   |           |                    |                 |        |        |             |        |        |
| LSTM    | N/A              |               |          |           |        |          |                   |              |          |           |        |                    |        |              |                   |           |                    |                 |        |        |             |        |        |

Through experiments, it was found that the proposed model predicted dental caries with higher sensitivity, specificity, precision, and accuracy when trained on a dataset to which feature selection and importance were applied. In addition, it can be seen that the model's accuracy is improved even when less features are used when Feature Selection and feature importance are applied together than when Feature Selection alone is applied. As mentioned before, SVM and LSTM models are training without applying the feature importance and the values are omitted from the table above.
